# Supplementary material for: Activation of the hypoxia-inducible factor pathway protects against acute ischemic stroke by reprogramming central carbon metabolism
Source: PubMed Central journal article supplement (PMC11103502; doi:10.7150/thno.88223), 2024-04-29
Supplement: thnov14p2856s1.pdf [file thnov14p2856s1.pdf]

## SUPPLEMENTARY MATERIAL

### **Activation of the hypoxia-inducible factor pathway protects against acute ischemic stroke by reprogramming central carbon metabolism**

Sarah Madai<sup>1</sup>, Pinar Kilic<sup>1</sup>, Rolf M. Schmidt<sup>2</sup>, Carlos Bas-Orth<sup>2, \*</sup>, Thomas Korff<sup>1</sup>, Michael Büttner<sup>3</sup>, Glynis Klinke<sup>3</sup>, Gernot Poschet<sup>3</sup>, Hugo H. Marti<sup>1</sup>, Reiner Kunze<sup>1</sup>

<sup>1</sup> Institute of Physiology and Pathophysiology, Department of Cardiovascular Physiology, Heidelberg University, Heidelberg, Germany

<sup>2</sup> Department of Medical Cell Biology, Institute for Anatomy and Cell Biology, Heidelberg University, Heidelberg, Germany

<sup>3</sup> Metabolomics Core Technology Platform, Centre for Organismal Studies, Heidelberg University, Heidelberg, Germany

\* present address: Institute of Clinical Neuroanatomy, Goethe University Frankfurt, Frankfurt, Germany

#### **Address for correspondence:**

Reiner Kunze

Heidelberg University

Institute of Physiology and Pathophysiology

Im Neuenheimer Feld 326

69120 Heidelberg, Germany

Phone +49 6221 54-4047

Fax +49 6221 54-8224

Email [reiner.kunze@mail.de](mailto:reiner.kunze@mail.de)

**Table S1** List of primers used to genotype mice.

| Allele              | Primer sequence (5'-3')    | Size (bp) of amplicon |
|---------------------|----------------------------|-----------------------|
| <i>Camk2a:cre</i>   | Fwd GGTTCTCCGTTTGCCTCAGGA  | 400                   |
|                     | Rev GCTTGCAGGTACAGGAGGTAGT |                       |
| <i>Hif1a</i> floxed | Fwd GCAGTTAAGAGCACTAGTTG   | wt: 215               |
|                     | Rev GGAGCTATCTCTCTAGACC    | floxed: 250           |
| <i>Hif2a</i> floxed | Fwd GAGAGCAGCTTCTCCTGGAA   | wt: 182               |
|                     | Rev TGTAGGCAAGGAAACCAAGG   | floxed: 220           |
| <i>Phd2</i> floxed  | Fwd CTCCTGACCTACGCCGTGT    | wt: 220               |
|                     | Rev CGCATCTTCCATCTCCATTT   | floxed: 386           |

**Table S2** Overview of animals that met defined exclusion criteria.

Animals that met the following criteria were excluded from end-point analyses: (1) death during surgery due to procedural or anesthetic problems, (2) death before sampling, (3) intracerebral hemorrhage, (4) structural brain abnormalities (e.g. hydrocephalus), and (5) no infarction.

| mouse line/strain                          |               | number of mice met exclusion criteria<br>(% of total animals) |     |     |     |     | total        |
|--------------------------------------------|---------------|---------------------------------------------------------------|-----|-----|-----|-----|--------------|
|                                            |               | (1)                                                           | (2) | (3) | (4) | (5) |              |
| <i>Phd2<sup>ff</sup></i>                   |               | –                                                             | 1   | –   | –   | 1   | 2 / 21 (10%) |
| <i>nPhd2<sup>Δ/Δ</sup></i>                 |               | –                                                             | –   | 1   | 1   | –   | 2 / 22 (9%)  |
| <i>Phd2/Hif1a/Hif2a<sup>fff/fff</sup></i>  |               | –                                                             | 3   | –   | –   | –   | 3 / 23 (13%) |
| <i>nPhd2/Hif1a/Hif2a<sup>ΔΔΔ/ΔΔΔ</sup></i> |               | –                                                             | 4   | –   | –   | –   | 4 / 25 (16%) |
| C57BL/6                                    | 0 mg/kg Roxa  | –                                                             | –   | –   | –   | –   | 0 / 9 (0%)   |
|                                            | 10 mg/kg Roxa | –                                                             | 1   | –   | –   | –   | 1 / 9 (11%)  |
| C57BL/6                                    | 0 mg/kg Roxa  | –                                                             | 1   | –   | –   | –   | 1 / 19 (5%)  |
|                                            | 40 mg/kg Roxa | –                                                             | –   | –   | –   | –   | 0 / 19 (0%)  |

**Table S3** LC gradient scheme for the separation of energy carrier metabolites.

| Time (min) | Flow (mL/min) | Phase A (%) | Phase B (%) |
|------------|---------------|-------------|-------------|
| 0          | 0.40          | 5           | 95          |
| 0.5        | 0.40          | 5           | 95          |
| 0.51       | 0.35          | 5           | 95          |
| 5          | 0.35          | 90          | 10          |
| 5.1        | 0.30          | 90          | 10          |
| 5.2        | 0.30          | 100         | 0           |
| 10         | 0.30          | 100         | 0           |
| 10.3       | 0.40          | 5           | 95          |
| 15         | 0.40          | 5           | 95          |

**Table S4** Metabolite multiple-reaction monitoring in positive and negative ion mode. First transition is used as quantifier transition, the second as qualifier transition.

| Compound ID             | RT (min) | Q1    | Q3      | DP   | EP  | CE  | CXP |
|-------------------------|----------|-------|---------|------|-----|-----|-----|
| ADP_1                   | 4.86     | 426   | 79      | -90  | -10 | -75 | -12 |
| ADP_2                   | 4.86     | 426   | 134.064 | -90  | -10 | -30 | -15 |
| AMP_1                   | 4.53     | 346   | 78.9    | -80  | -10 | -74 | -11 |
| AMP_2                   | 4.53     | 346   | 134.039 | -80  | -10 | -37 | -15 |
| ATP_1                   | 5.23     | 506   | 158.9   | -170 | -10 | -36 | -19 |
| ATP_2                   | 5.23     | 506   | 408.027 | -170 | -10 | -29 | -35 |
| GDP_1                   | 5.2      | 442.1 | 150.1   | -80  | -10 | -33 | -9  |
| GDP_2                   | 5.2      | 442.1 | 344.065 | -80  | -10 | -25 | -34 |
| GDP-Mannose_1           | 5.08     | 604.2 | 442     | -140 | -10 | -36 | -31 |
| GDP-Mannose_2           | 5.08     | 604.2 | 424.005 | -140 | -10 | -41 | -18 |
| GMP_1                   | 4.85     | 362   | 78.9    | -70  | -10 | -75 | -10 |
| GMP_2                   | 4.85     | 362   | 211.028 | -70  | -10 | -24 | -17 |
| GTP_1                   | 5.61     | 522   | 159     | -130 | -10 | -42 | -8  |
| GTP_3                   | 5.61     | 522   | 424.044 | -130 | -10 | -29 | -17 |
| UDP-GlcNAc_1            | 4.68     | 606.1 | 385     | -150 | -10 | -37 | -18 |
| UDP-GlcNAc_2            | 4.53     | 606.1 | 78.928  | -150 | -10 | -95 | -11 |
| UDP-Glucose-Galactose_1 | 4.82     | 565.1 | 323.1   | -130 | -10 | -32 | -29 |
| UDP-Glucose-Galactose_2 | 4.68     | 565.1 | 78.924  | -130 | -10 | -95 | -20 |
| Adenine_1               | 1.88     | 136.4 | 91.9    | 110  | 10  | 38  | 10  |
| Adenine_2               | 1.88     | 136.4 | 93.947  | 110  | 10  | 27  | 10  |
| Adenosine_1             | 2.076    | 267.9 | 136.1   | 80   | 10  | 20  | 17  |
| Adenosine_2             | 2.076    | 267.9 | 119.06  | 80   | 10  | 61  | 7   |

|                |       |         |         |     |    |    |    |
|----------------|-------|---------|---------|-----|----|----|----|
| ADPR_1         | 4.56  | 560.1   | 348.1   | 90  | 10 | 24 | 12 |
| ADPR_2         | 4.56  | 560.1   | 136.083 | 90  | 10 | 37 | 12 |
| Cytidine_1     | 2.891 | 244.1   | 112     | 10  | 10 | 22 | 13 |
| Cytidine_2     | 2.891 | 244.1   | 94.967  | 10  | 10 | 57 | 14 |
| Cytosine_1     | 2.37  | 112.4   | 68.9    | 90  | 10 | 23 | 8  |
| Cytosine_2     | 2.37  | 112.4   | 67.89   | 90  | 10 | 32 | 8  |
| FAD_1          | 4.33  | 786.2   | 348.1   | 120 | 10 | 31 | 16 |
| FAD_2          | 4.33  | 786.2   | 439.153 | 120 | 10 | 42 | 21 |
| Guanine_1      | 2.718 | 152.1   | 110     | 90  | 10 | 27 | 10 |
| Guanine_2      | 2.718 | 152.1   | 107.004 | 90  | 10 | 34 | 13 |
| Guanosine_1    | 3.08  | 284.1   | 152.1   | 60  | 10 | 17 | 12 |
| Guanosine_2    | 3.06  | 284.1   | 135.055 | 60  | 10 | 52 | 7  |
| Hypoxanthine_1 | 2.009 | 137     | 110     | 90  | 10 | 27 | 13 |
| Hypoxanthine_2 | 2.009 | 137     | 93.979  | 90  | 10 | 27 | 11 |
| Inosine_1      | 2.61  | 269.2   | 137.1   | 50  | 10 | 14 | 9  |
| Inosine_2      | 2.61  | 269.2   | 110.049 | 50  | 10 | 56 | 16 |
| NA_1           | 2.62  | 124.006 | 77.874  | 70  | 10 | 30 | 10 |
| NA_2           | 2.62  | 124.006 | 79.912  | 70  | 10 | 27 | 35 |
| NAD_1          | 4.72  | 663.924 | 427.9   | 6   | 10 | 35 | 22 |
| NAD_2          | 4.72  | 663.924 | 524     | 6   | 10 | 25 | 22 |
| NADH_1         | 4.37  | 665.953 | 513.9   | 60  | 10 | 33 | 26 |
| NADH_2         | 4.37  | 665.953 | 301.9   | 60  | 10 | 47 | 16 |
| NADP_1         | 5.22  | 743.915 | 603.9   | 66  | 10 | 29 | 30 |
| NADP_2         | 5.22  | 743.915 | 507.9   | 66  | 10 | 39 | 24 |

|                        |      |         |         |    |    |     |    |
|------------------------|------|---------|---------|----|----|-----|----|
| NADPH_1                | 4.98 | 745.927 | 302     | 60 | 10 | 45  | 28 |
| NADPH_2                | 4.98 | 745.927 | 108     | 60 | 10 | 113 | 12 |
| NAMN_1                 | 4.92 | 335.9   | 124.1   | 30 | 10 | 16  | 11 |
| NAMN_2                 | 4.92 | 335.9   | 96.94   | 30 | 10 | 45  | 16 |
| Nicotinamide_1         | 1    | 123.1   | 79.9    | 70 | 10 | 28  | 9  |
| Nicotinamide_2         | 1    | 123.1   | 77.888  | 70 | 10 | 31  | 8  |
| N-Methylnicotinamide_1 | 0.86 | 137.1   | 79.9    | 70 | 10 | 29  | 10 |
| N-Methylnicotinamide_2 | 0.86 | 137.1   | 108.05  | 70 | 10 | 23  | 15 |
| NMN_1                  | 5.1  | 335     | 123     | 30 | 10 | 19  | 14 |
| NMN_2                  | 5.1  | 335     | 96.959  | 30 | 10 | 43  | 10 |
| NR_1                   | 3.93 | 256.266 | 124.092 | 40 | 10 | 15  | 6  |
| NR_2                   | 3.93 | 256.266 | 107.058 | 40 | 10 | 41  | 11 |
| SAH_1                  | 4.37 | 385.104 | 136.098 | 70 | 10 | 22  | 13 |
| SAH_2                  | 4.37 | 385.104 | 250.131 | 70 | 10 | 18  | 35 |
| SAM_1                  | 6.06 | 400.296 | 299.113 | 70 | 10 | 18  | 27 |
| SAM_2                  | 6.06 | 400.296 | 136.098 | 70 | 10 | 18  | 27 |
| Uracil_1               | 1.99 | 113.1   | 69.9    | 60 | 10 | 21  | 13 |
| Uridine_1              | 1.99 | 245.1   | 113     | 50 | 10 | 14  | 12 |
| NAAD_1                 | 4.72 | 666.2   | 136.1   | 70 | 10 | 61  | 16 |
| NAAD_2                 | 4.72 | 666.2   | 543.074 | 70 | 10 | 21  | 18 |

ADP: Adenosine di-phosphate; ADPR: Adenine diphosphate ribose; AMP: Adenosine mono-phosphate; ATP: Adenosine tri-phosphate; FAD: Flavin adenine dinucleotide; GDP: Guanosine di-phosphate; GMP: Guanosine mono-phosphate; GTP: Guanosine tri-phosphate; NA: Nicotinic acid; NAAD: Nicotinic acid adenine dinucleotide; NAD: Nicotinamide adenine dinucleotide; NADP: Nicotinamide adenine dinucleotide phosphate; NAM: Nicotinamide; NAMN: Nicotinic acid mononucleotide; NMN: Nicotinamide mononucleotide; NR: Nicotinamide riboside; SAH: S-Adenosylhomocystein; SAM: S-Adenosylmethionin; UDP: Uridine di-phosphate

**Table S5** List of antibodies used for immunoblotting.

| Antibody type | Immunogen         | Host species | Clonality  | Conjugate | Supplier           | Catalog no.   |
|---------------|-------------------|--------------|------------|-----------|--------------------|---------------|
| Primary       | hu beta Tubulin   | rb           | polyclonal | /         | Abcam              | ab6046        |
| Primary       | hu HIF-1 $\alpha$ | rb           | polyclonal | /         | Novus              | NB100-449     |
| Primary       | hu PDK1           | rb           | polyconal  | /         | Enzo Life Sciences | ADI-KAP-PK112 |
| Primary       | hu phospho-PDHA1  | rb           | polyclonal | /         | Merck Millipore    | ABS204        |
| Primary       | hu PDHA1          | ms           | monoclonal | /         | Thermo Fisher      | 45-6600       |
| Primary       | hu PFKFB3         | rb           | monoclonal | /         | Cell Signaling     | 13123         |
| Primary       | ms PHD2           | rb           | polyclonal | /         | Novus              | NB100-2219    |
| Primary       | hu TBP            | ms           | monoclonal | /         | Abcam              | ab818         |
| Secondary     | rb IgG            | gt           | polyclonal | HRP       | Thermo Fisher      | 31460         |
| Secondary     | ms IgG            | gt           | polyclonal | HRP       | Thermo Fisher      | 31432         |

gt: goat; HIF, hypoxia-inducible factor; HRP: horseradish peroxidase; hu: human; ms: mouse; PDK1: pyruvate dehydrogenase kinase 1; PDHA1: pyruvate dehydrogenase E1 component subunit alpha; PFKFB3: 6-Phosphofructo-2-Kinase/Fructose-2,6-Biphosphatase 3; PHD2: prolyl-4-hydroxylase domain 2; rb: rabbit; TBP: TATA-box-binding protein



**Table S6** List of primers used for quantitative real-time RT-PCR.

| Gene          | Forward primer sequence (5'-3') | Reverse primer sequence (5'-3') |
|---------------|---------------------------------|---------------------------------|
| <i>Aldoa</i>  | CCATGCTTGCACCCAGAAAT            | AGACAGGAAAGTGACCCCAG            |
| <i>Bnip3</i>  | GCTCCCAGACACCACAAGAT            | TGAGAGTAGCTGTGCGCTTC            |
| <i>Bnip3l</i> | TGAGGAAGAGTGGAGCCATG            | TATAGATGCCGAGCCCCAAG            |
| <i>Cox2</i>   | AGAAGGAAATGGCTGCAGAA            | GCTCGGCTTCCAGTATTGAG            |
| <i>Cox4i2</i> | CATTGGATTCACGGCTCTGG            | TGCTCTTCATGTCCAGGAGG            |
| <i>Dec1</i>   | TATCTCATCCCACCATCGGC            | GCCAAAGGAGAAGGGAGTCT            |
| <i>Gbe1</i>   | AGGATGTATCAGGGATGCCG            | CAAGGTAGCGTCGATTGGTG            |
| <i>Glut1</i>  | GCTGTGCTTATGGGCTTCTC            | AGAGGCCACAAGTCTGCATT            |
| <i>Glut3</i>  | TGTCACAGGAGAAGCAGGTG            | GCTCCAATCGTGGCATAGAT            |
| <i>Gys1</i>   | CTGGCCGCTATGAGTTTTCC            | TGGCTGTGTCCCATAGTTGT            |
| <i>Hif1a</i>  | TGCTCATCAGTTGCCACTTC            | CGGCATCCAGAAGTTTTCTC            |
| <i>Hk2</i>    | TACCACACACCCTACAGCAG            | CTCGGGAATGGCGTAGATCT            |
| <i>Il1b</i>   | ATAACCTGCTGGTGTGTGACG           | GGTGGAGAGCTTTCAGCTCAT           |
| <i>Il6</i>    | AGTTGCCTTCTTGGGACTGA            | TCCACGATTTCCAGAGAAC             |
| <i>Ldha</i>   | CCGTTACCTGATGGGAGAGA            | GTAGGCACTGTCCACCACCT            |
| <i>Lonp1</i>  | AACTACCTGGACTGGCTGAC            | ACGCTTCTTCACATCCTCCA            |
| <i>Mcp1</i>   | CCCAATGAGTAGGCTGGAGA            | TCTGGACCCATTCTTCTTG             |
| <i>Mct1</i>   | TGGTGGTTGTCTGTCTGGTT            | TTGAAAGCAAGCCCAAGACC            |
| <i>Mct2</i>   | GTTTGCTCGGCCTTCTGTAG            | ACGTAGACCACCAAAGCTGA            |
| <i>Mct4</i>   | TCAATCATGGTGCTGGGACT            | AGGATGGTGAGAAGGAAGGC            |
| <i>Pdk1</i>   | GGCGGCTTTGTGATTTGTAT            | ACCTGAATCGGGGGATAAAC            |
| <i>Pfk1</i>   | ATGGCAAAGCTATCGGTGTC            | ACACAGTCCCATTGGCTTC             |
| <i>Pfkfb3</i> | TGACTCGCTACCTCAACTGG            | AAGGCACACTGTTTTCGGAC            |
| <i>Pgk1</i>   | CAAGGCTTTGGAGAGTCCAG            | TGTGCCAATCTCCATGTTGT            |
| <i>Pgm1</i>   | GCATTCCGTACTIONTCCAGCAG         | CCAAAGCTCTCCTCTCCACA            |

|                |                      |                      |
|----------------|----------------------|----------------------|
| <i>Phd1</i>    | GCTAGGCTGAGGGAGGAAGT | CCCCAAGAAGTTGTCCTTGA |
| <i>Phd2</i>    | TCACGCATCTTCCATCTCCA | GGCAACGGAACAGGCTATG  |
| <i>Phd3</i>    | GCTATCCAGGAAATGGGACA | TGGCGTCCCAATTCTTATTC |
| <i>Pparg1a</i> | TCAGAACCATGCAGCAAACC | TTGGTGTGAGGAGGGTCATC |
| <i>Pygb</i>    | GGGATAAGGCCTGGGAGATC | TCCAAGTGCCTCTGGTTGAT |
| <i>Rps12</i>   | GAAGCTGCCAAAGCCTTAGA | AACTGCAACCAACCACCTTC |
| <i>Tnf</i>     | CGTCAGCCGATTTGCTATCT | CGGACTCCGCAAAGTCTAAG |
| <i>Vegfa</i>   | GTACCTCCATGCCAAGT    | ACTCCAGGGCTTCATCGTTA |

*Aldoa*: fructose-bisphosphate aldolase A; *Bnip3*: BCL2/adenovirus E1B 19kDa interacting protein 3; *Bnip3l*: Bnip3-like; *Cox2*: cyclooxygenase-2; *Cox4i2*: cytochrome c oxidase subunit 4 isoform 2; *Dec1*: deleted in esophageal cancer 1; *Gbe1*: 1,4-alpha-glucan branching enzyme 1; *Glut*: glucose transporter; *Gys1*: glycogen synthase 1; *Hif*: hypoxia-inducible factor; *Hk2*: hexokinase 2; *Il1b*: interleukin-1 beta; *Ldh*: lactate dehydrogenase; *Lonp1*: lon protease 1; *Mcp-1*: monocyte chemoattractant protein-1; *Mct*: monocarboxylate transporter; *Pdk1*: pyruvate dehydrogenase kinase 1; *Pfk1*: phosphofructokinase 1; *Pfkfb3*: 6-phosphofructo-2-kinase/fructose-2,6-bisphosphatase 3; *Pgk1*: phosphoglycerate kinase 1; *Pgml*: phosphoglucomutase 1; *Phd*: prolyl-4-hydroxylase domain; *Pparg1a*: peroxisome proliferator-activated receptor gamma co-activator 1 alpha; *Pygb*: glycogen phosphorylase B; *Rps12*: 40S ribosomal protein S12; *Tnf*: tumor necrosis factor alpha; *Vegfa*: vascular endothelial growth factor A

**Table S7** Results of semi-targeted metabolomics.

| compound name                 | database ID |         |        | mean $\pm$ SD                   |                           | <i>p</i> -value |
|-------------------------------|-------------|---------|--------|---------------------------------|---------------------------|-----------------|
|                               | HMDB        | PubChem | KEGG   | <i>Phd2<sup>flox/flox</sup></i> | <i>nPhd2<sup>ΔΔ</sup></i> |                 |
| L-Serine                      | HMDB0000187 | 5951    | C00065 | 1.60E+07 $\pm$ 3.62E+06         | 2.56E+07 $\pm$ 2.38E+06   | 0.0011          |
| Pyruvic acid                  | HMDB0000243 | 1060    | C00022 | 7.88E+06 $\pm$ 1.16E+06         | 5.35E+06 $\pm$ 7.04E+05   | 0.0031          |
| L-Proline                     | HMDB0000162 | 145742  | C00148 | 2.96E+06 $\pm$ 8.80E+05         | 4.63E+06 $\pm$ 2.56E+05   | 0.0037          |
| L-Glutamic acid               | HMDB0000148 | 33032   | C00302 | 4.64E+07 $\pm$ 1.72E+06         | 5.54E+07 $\pm$ 5.01E+06   | 0.0052          |
| N-Acetyl-L-glutamic acid      | HMDB0001138 | 70914   | C00624 | 1.12E+07 $\pm$ 6.53E+06         | 2.33E+07 $\pm$ 4.22E+06   | 0.0082          |
| D-Sorbitol                    | HMDB0000247 | 5780    | C00794 | 1.55E+07 $\pm$ 2.99E+06         | 2.22E+07 $\pm$ 3.45E+06   | 0.0115          |
| Palmitic Acid                 | HMDB0000220 | 985     | C00249 | 1.30E+07 $\pm$ 9.51E+06         | 4.82E+07 $\pm$ 2.30E+07   | 0.0133          |
| Fumaric acid                  | HMDB0000134 | 444972  | C00122 | 1.66E+07 $\pm$ 2.11E+06         | 2.02E+07 $\pm$ 1.70E+06   | 0.0173          |
| D-Fructose                    | HMDB0000660 | 439709  | C00095 | 4.27E+06 $\pm$ 9.10E+05         | 7.80E+06 $\pm$ 2.70E+06   | 0.0245          |
| Butanoic acid                 | HMDB0000039 | 264     | C00246 | 2.26E+06 $\pm$ 4.67E+05         | 3.12E+06 $\pm$ 4.41E+05   | 0.0262          |
| Glyceric acid                 | HMDB0000139 | 439194  | C00258 | 7.46E+06 $\pm$ 6.94E+05         | 9.20E+06 $\pm$ 1.29E+06   | 0.0286          |
| L-Valine                      | HMDB0000883 | 6287    | C00183 | 1.55E+07 $\pm$ 1.23E+06         | 1.82E+07 $\pm$ 1.86E+06   | 0.0299          |
| Glycerol-2-phosphate          | HMDB0002520 | 2526    | C02979 | 8.52E+05 $\pm$ 5.48E+04         | 1.06E+06 $\pm$ 1.67E+05   | 0.0302          |
| Lactic acid                   | HMDB0000190 | 107689  | C00186 | 4.30E+07 $\pm$ 4.16E+06         | 4.88E+07 $\pm$ 3.22E+06   | 0.0385          |
| Phosphoric acid               | HMDB0001429 | 1004    | C00009 | 1.43E+07 $\pm$ 2.60E+06         | 1.83E+07 $\pm$ 2.54E+06   | 0.0393          |
| Glycerol                      | HMDB0000131 | 753     | C00116 | 2.74E+06 $\pm$ 3.53E+05         | 2.28E+06 $\pm$ 2.31E+05   | 0.0413          |
| L-Phenylalanine               | HMDB0000159 | 6140    | C00079 | 1.54E+06 $\pm$ 8.96E+05         | 3.66E+06 $\pm$ 1.09E+06   | 0.0417          |
| 5-Hydroxymethyl-2-furoic acid | HMDB0002432 | 80642   | C20448 | 7.76E+05 $\pm$ 4.61E+05         | 1.77E+06 $\pm$ 5.63E+05   | 0.0431          |
| Alpha-Ketoglutaric acid       | HMDB0000208 | 51      | C00026 | 7.55E+05 $\pm$ 7.03E+04         | 8.67E+05 $\pm$ 7.97E+04   | 0.0461          |

|                                 |             |          |        |                     |                     |        |
|---------------------------------|-------------|----------|--------|---------------------|---------------------|--------|
| Pyroglutamic acid               | HMDB0000267 | 7405     | C01879 | 1.14E+08 ± 1.56E+07 | 9.92E+07 ± 3.48E+06 | 0.0684 |
| Scyllo-Inositol                 | HMDB0006088 | 892      | C06153 | 5.04E+07 ± 5.54E+06 | 4.49E+07 ± 3.17E+06 | 0.0916 |
| Pyrazine                        | HMDB0034176 | 9061     | C02018 | 1.65E+06 ± 5.12E+04 | 1.85E+06 ± 2.47E+05 | 0.1056 |
| 2-hydroxymalonic acid           | HMDB0035227 | 45       | C02287 | 4.10E+06 ± 2.81E+06 | 7.14E+06 ± 2.67E+06 | 0.1178 |
| L-Aspartic acid                 | HMDB0000191 | 5960     | C00049 | 2.60E+08 ± 4.82E+07 | 2.18E+08 ± 2.74E+07 | 0.1296 |
| Urea                            | HMDB0000294 | 1176     | C00086 | 1.55E+08 ± 3.85E+07 | 2.05E+08 ± 5.67E+07 | 0.1409 |
| N-Acetyl-D-glucosamine          | HMDB0000215 | 439174   | C00140 | 1.40E+06 ± 1.72E+05 | 9.60E+05 ± 6.21E+05 | 0.1664 |
| Cholesterol                     | HMDB0000067 | 5997     | C00187 | 2.02E+07 ± 2.04E+07 | 4.57E+07 ± 3.30E+07 | 0.1796 |
| 3-Hydroxy-3-methylglutaric acid | HMDB0000355 | 1662     | C03761 | 8.00E+06 ± 1.86E+06 | 9.48E+06 ± 1.47E+06 | 0.2012 |
| 3-Hydroxypropionic acid         | HMDB0000700 | 68152    | C01013 | 4.54E+06 ± 1.10E+06 | 5.67E+06 ± 1.40E+06 | 0.2150 |
| Oxalic acid                     | HMDB0002329 | 971      | C00209 | 3.74E+07 ± 8.46E+06 | 4.40E+07 ± 7.08E+06 | 0.2202 |
| 3,4-Dihydroxyphenylacetic acid  | HMDB0001336 | 547      | C01161 | 1.12E+05 ± 4.84E+04 | 1.45E+05 ± 3.08E+04 | 0.2375 |
| D-Gluconic acid                 | HMDB0000625 | 10690    | C00257 | 5.07E+05 ± 4.49E+05 | 8.68E+05 ± 5.55E+05 | 0.2910 |
| Myo-Inositol                    | HMDB0000211 | –        | C00137 | 2.88E+08 ± 3.48E+07 | 2.65E+08 ± 2.85E+07 | 0.2963 |
| D-Arabino-hexos-2-ulose         | HMDB0029932 | 159630   | –      | 8.42E+06 ± 3.23E+06 | 1.11E+07 ± 4.21E+06 | 0.2983 |
| Ethylene glycol                 | HMDB0037790 | 174      | C01380 | 1.05E+07 ± 3.22E+06 | 8.70E+06 ± 1.79E+06 | 0.3153 |
| Acetic acid hydrazide           | HMDB0060428 | 14039    | C07447 | 2.70E+06 ± 7.73E+05 | 2.14E+06 ± 5.36E+05 | 0.3158 |
| Ascorbic acid                   | HMDB0000044 | 54670067 | C00072 | 1.30E+08 ± 2.94E+07 | 1.11E+08 ± 2.57E+07 | 0.3169 |
| Erythritol                      | HMDB0002994 | 222285   | C00503 | 2.51E+06 ± 9.10E+05 | 1.78E+06 ± 1.04E+06 | 0.3313 |
| 3-Hydroxybutyric acid           | HMDB0000011 | 92135    | C01089 | 1.18E+07 ± 2.82E+06 | 3.71E+07 ± 5.87E+07 | 0.3639 |
| Caproic acid                    | HMDB0000535 | 8892     | C01585 | 5.88E+05 ± 2.89E+05 | 4.35E+05 ± 2.11E+05 | 0.3649 |
| L-Methionine                    | HMDB0000696 | 6137     | C00073 | 5.53E+06 ± 9.26E+05 | 5.99E+06 ± 6.59E+05 | 0.3886 |

|                            |             |         |        |                     |                     |        |
|----------------------------|-------------|---------|--------|---------------------|---------------------|--------|
| L-Threonine                | HMDB0000167 | 6288    | C00188 | 5.87E+07 ± 8.04E+06 | 6.41E+07 ± 1.08E+07 | 0.4020 |
| 2-Pentenoic acid           | HMDB0032459 | 638122  | –      | 6.77E+06 ± 2.87E+05 | 7.08E+06 ± 6.29E+05 | 0.4141 |
| Malic acid                 | HMDB0000156 | 222656  | C00149 | 4.20E+07 ± 3.79E+06 | 4.44E+07 ± 4.89E+06 | 0.4165 |
| Ribitol                    | HMDB0000508 | –       | C00474 | 9.44E+06 ± 2.59E+06 | 8.34E+06 ± 1.65E+06 | 0.4480 |
| L-Homoserine               | HMDB0000719 | 12647   | C00263 | 3.07E+06 ± 2.03E+06 | 2.29E+06 ± 9.43E+05 | 0.4584 |
| Niacinamide                | HMDB0001406 | 936     | C00153 | 1.15E+07 ± 6.38E+06 | 8.29E+06 ± 6.76E+06 | 0.4682 |
| Picolinic acid             | HMDB0002243 | 1018    | C10164 | 1.20E+06 ± 5.55E+05 | 9.40E+05 ± 8.46E+04 | 0.4726 |
| Creatinine                 | HMDB0000562 | 588     | C00791 | 1.60E+08 ± 3.35E+07 | 1.40E+08 ± 4.60E+07 | 0.4870 |
| L-Alanine                  | HMDB0000161 | 5950    | C00041 | 1.47E+08 ± 2.08E+07 | 1.38E+08 ± 1.92E+07 | 0.4979 |
| D-Pinitol                  | HMDB0034219 | –       | C03844 | 1.10E+06 ± 7.39E+05 | 1.35E+06 ± 5.31E+05 | 0.5421 |
| Aminomalonic acid          | HMDB0001147 | 100714  | C00872 | 1.73E+07 ± 6.46E+06 | 1.52E+07 ± 3.49E+06 | 0.5554 |
| Alpha-Hydroxyglutaric acid | HMDB0059655 | 43      | C02630 | 5.87E+07 ± 5.39E+06 | 6.06E+07 ± 4.37E+06 | 0.5563 |
| Succinic acid              | HMDB0000254 | 1738118 | C00042 | 4.72E+07 ± 6.17E+06 | 4.51E+07 ± 5.12E+06 | 0.5699 |
| L-Leucine                  | HMDB0000687 | 6106    | C00123 | 1.63E+07 ± 1.11E+06 | 1.67E+07 ± 1.21E+06 | 0.5850 |
| Glycine                    | HMDB0000123 | 750     | C00037 | 3.64E+07 ± 6.64E+06 | 3.92E+07 ± 8.85E+06 | 0.5921 |
| 4-aminobutanoic acid       | HMDB0000112 | 119     | C00334 | 1.30E+08 ± 7.32E+06 | 1.27E+08 ± 8.95E+06 | 0.5986 |
| Ribonic acid               | HMDB0000867 | 5460677 | C01685 | 2.15E+07 ± 2.71E+06 | 2.26E+07 ± 4.32E+06 | 0.6194 |
| Ethanolamine               | HMDB0000149 | 700     | C00189 | 4.25E+07 ± 6.63E+06 | 4.08E+07 ± 4.03E+06 | 0.6219 |
| Erythronic acid            | HMDB0000613 | 2781043 | –      | 3.57E+07 ± 4.32E+06 | 3.46E+07 ± 1.46E+06 | 0.6219 |
| Phosphorylethanolamine     | HMDB0000224 | 1015    | C00346 | 5.82E+07 ± 9.55E+06 | 6.03E+07 ± 6.50E+06 | 0.6972 |
| cis-Aconitic acid          | HMDB0000072 | 643757  | C00417 | 1.10E+06 ± 5.54E+05 | 9.99E+05 ± 4.79E+05 | 0.7665 |
| D-Glucose                  | HMDB0000122 | 64589   | C00031 | 2.96E+07 ± 9.53E+06 | 3.23E+07 ± 1.68E+07 | 0.7672 |

|                        |             |         |        |                     |                     |        |
|------------------------|-------------|---------|--------|---------------------|---------------------|--------|
| 3-Phosphoglyceric acid | HMDB0000807 | 724     | C00597 | 7.28E+06 ± 1.75E+06 | 6.92E+06 ± 1.99E+06 | 0.7874 |
| Beta-Alanine           | HMDB0000056 | 239     | C00099 | 2.52E+07 ± 1.64E+07 | 2.72E+07 ± 8.87E+06 | 0.8177 |
| Glycolic acid          | HMDB0000115 | 757     | C03547 | 1.38E+07 ± 1.51E+06 | 1.35E+07 ± 1.74E+06 | 0.8281 |
| Glycerol-3-phosphate   | HMDB0000126 | 439162  | C00093 | 1.02E+08 ± 5.54E+07 | 9.39E+07 ± 5.18E+07 | 0.8312 |
| Pantothenic acid       | HMDB0000210 | 6613    | C00864 | 3.70E+06 ± 1.02E+06 | 3.52E+06 ± 1.49E+06 | 0.8414 |
| L-Isoleucine           | HMDB0000172 | 6306    | C00407 | 7.57E+06 ± 1.76E+06 | 7.67E+06 ± 8.65E+05 | 0.9127 |
| Citric acid            | HMDB0000094 | 311     | C00158 | 6.76E+07 ± 1.27E+07 | 6.70E+07 ± 7.25E+06 | 0.9223 |
| Uracil                 | HMDB0000300 | 1174    | C00106 | 2.26E+06 ± 7.42E+05 | 2.29E+06 ± 2.66E+05 | 0.9228 |
| Erythrono-1,4-lactone  | HMDB0000349 | 5325915 | –      | 1.17E+07 ± 1.26E+06 | 1.17E+07 ± 1.82E+06 | 0.9727 |
| 1,5-Anhydroglucitol    | HMDB0002712 | 64960   | C07326 | 1.76E+07 ± 4.55E+06 | 1.75E+07 ± 3.20E+06 | 0.9814 |

**Table S8** Results from Quantitative Enrichment analysis.

| <b>Pathway name</b>                                 | <b>Raw p</b> | <b>Holm p</b> | <b>FDR</b> |
|-----------------------------------------------------|--------------|---------------|------------|
| Arginine and proline metabolism                     | 0.0006       | 0.0160        | 0.0055     |
| Glycine, serine and threonine metabolism            | 0.0008       | 0.0213        | 0.0055     |
| Glyoxylate and dicarboxylate metabolism             | 0.0008       | 0.0213        | 0.0055     |
| Cysteine and methionine metabolism                  | 0.0010       | 0.0248        | 0.0055     |
| D-Amino acid metabolism                             | 0.0011       | 0.0282        | 0.0055     |
| Sphingolipid metabolism                             | 0.0011       | 0.0282        | 0.0055     |
| Lipoic acid metabolism                              | 0.0030       | 0.0701        | 0.0079     |
| Glycolysis / Gluconeogenesis                        | 0.0031       | 0.0701        | 0.0079     |
| Alanine, aspartate and glutamate metabolism         | 0.0033       | 0.0701        | 0.0079     |
| Citrate cycle (TCA cycle)                           | 0.0033       | 0.0701        | 0.0079     |
| Tyrosine metabolism                                 | 0.0033       | 0.0701        | 0.0079     |
| Pyruvate metabolism                                 | 0.0033       | 0.0701        | 0.0079     |
| Arginine biosynthesis                               | 0.0052       | 0.0878        | 0.0115     |
| Galactose metabolism                                | 0.0100       | 0.1600        | 0.0176     |
| Fructose and mannose metabolism                     | 0.0101       | 0.1600        | 0.0176     |
| Phenylalanine metabolism                            | 0.0105       | 0.1600        | 0.0176     |
| Phenylalanine, tyrosine and tryptophan biosynthesis | 0.0105       | 0.1600        | 0.0176     |
| Butanoate metabolism                                | 0.0114       | 0.1600        | 0.0176     |
| Fatty acid biosynthesis                             | 0.0133       | 0.1600        | 0.0176     |
| Fatty acid elongation                               | 0.0133       | 0.1600        | 0.0176     |
| Fatty acid degradation                              | 0.0133       | 0.1600        | 0.0176     |
| Biosynthesis of unsaturated fatty acids             | 0.0133       | 0.1600        | 0.0176     |
| Starch and sucrose metabolism                       | 0.0245       | 0.1720        | 0.0296     |
| Amino sugar and nucleotide sugar metabolism         | 0.0245       | 0.1720        | 0.0296     |
| Glycerolipid metabolism                             | 0.0264       | 0.1720        | 0.0299     |
| Pentose phosphate pathway                           | 0.0286       | 0.1720        | 0.0299     |
| Valine, leucine and isoleucine degradation          | 0.0299       | 0.1720        | 0.0299     |
| Valine, leucine and isoleucine biosynthesis         | 0.0299       | 0.1720        | 0.0299     |
| Pantothenate and CoA biosynthesis                   | 0.0299       | 0.1720        | 0.0299     |

**Table S9** Results of semi-targeted metabolomics.

| compound name              | database ID |           |        | mean $\pm$ SD           |                         | <i>p</i> -value |
|----------------------------|-------------|-----------|--------|-------------------------|-------------------------|-----------------|
|                            | HMDB        | PubChem   | KEGG   | vehicle                 | Roxadustat              |                 |
| Alpha-Ketoglutaric acid    | HMDB0000208 | 51        | C00026 | 9.20E+05 $\pm$ 5.59E+04 | 1.27E+06 $\pm$ 9.03E+04 | 0.0010          |
| Alpha-D-Glucose            | HMDB0003345 | 79025     | C00267 | 8.63E+07 $\pm$ 1.12E+07 | 1.16E+08 $\pm$ 9.69E+06 | 0.0021          |
| D-myo-inositol 3-phosphate | HMDB0000213 | –         | C01177 | 5.63E+07 $\pm$ 2.46E+07 | 1.08E+08 $\pm$ 1.61E+07 | 0.0042          |
| Erythrono-1,4-lactone      | HMDB0000349 | 5325915   | –      | 2.69E+07 $\pm$ 4.34E+06 | 3.42E+07 $\pm$ 2.24E+06 | 0.0100          |
| Citric acid                | HMDB0000094 | 311       | C00158 | 8.95E+07 $\pm$ 2.77E+07 | 1.63E+08 $\pm$ 5.22E+06 | 0.0108          |
| Butanoic acid              | HMDB0000039 | 264       | C00246 | 1.18E+07 $\pm$ 6.19E+06 | 2.44E+07 $\pm$ 5.67E+06 | 0.0151          |
| Creatinine                 | HMDB0000562 | 588       | C00791 | 2.38E+08 $\pm$ 6.00E+06 | 2.68E+08 $\pm$ 1.78E+07 | 0.0152          |
| Glycerol-2-phosphate       | HMDB0002520 | 2526      | C02979 | 9.51E+06 $\pm$ 3.39E+06 | 1.54E+07 $\pm$ 2.61E+06 | 0.0152          |
| L-Glutamic acid            | HMDB0000148 | 33032     | C00025 | 2.31E+08 $\pm$ 8.51E+07 | 4.02E+08 $\pm$ 9.40E+07 | 0.0167          |
| L-Threonine                | HMDB0000167 | 6288      | C00188 | 6.04E+07 $\pm$ 2.58E+07 | 9.14E+07 $\pm$ 5.27E+06 | 0.0299          |
| 2-Pentenoic acid           | HMDB0032459 | 638122    | –      | 1.28E+07 $\pm$ 6.14E+06 | 2.47E+07 $\pm$ 5.56E+06 | 0.0305          |
| 1,5-Anhydroglucitol        | HMDB0002712 | 64960     | C07326 | 3.67E+07 $\pm$ 2.35E+07 | 6.55E+07 $\pm$ 7.84E+06 | 0.0322          |
| 2-Phosphoglyceric acid     | HMDB0000362 | 59        | –      | 4.45E+05 $\pm$ 2.49E+05 | 2.12E+06 $\pm$ 1.43E+06 | 0.0325          |
| Alpha-Hydroxyglutaric acid | –           | 163312007 | C20267 | 6.13E+07 $\pm$ 1.28E+07 | 7.89E+07 $\pm$ 9.86E+06 | 0.0409          |
| Lactic Acid                | HMDB0000190 | 61503     | C00186 | 3.45E+07 $\pm$ 2.25E+07 | 1.70E+08 $\pm$ 1.28E+08 | 0.0473          |
| Picolinic acid             | HMDB0002243 | 1018      | C10164 | 1.79E+06 $\pm$ 3.53E+05 | 2.23E+06 $\pm$ 2.32E+05 | 0.0481          |
| Fumaric acid               | HMDB0000134 | 444972    | C00122 | 1.89E+07 $\pm$ 8.71E+06 | 2.98E+07 $\pm$ 5.84E+06 | 0.0485          |
| N-Acetylgalactosamine      | HMDB0000212 | 84265     | C01074 | 3.01E+07 $\pm$ 1.53E+07 | 4.67E+07 $\pm$ 5.04E+06 | 0.0492          |
| Glyceric acid              | HMDB0000139 | 439194    | C00258 | 2.02E+07 $\pm$ 6.21E+06 | 2.87E+07 $\pm$ 5.32E+06 | 0.0492          |



|                        |             |          |        |                     |                     |        |
|------------------------|-------------|----------|--------|---------------------|---------------------|--------|
| 5'-Methylthioadenosine | HMDB0001173 | 439176   | C00170 | 4.80E+06 ± 2.26E+06 | 7.51E+06 ± 3.55E+05 | 0.0520 |
| Adenosine              | HMDB0000050 | 60961    | C00212 | 1.17E+07 ± 8.70E+06 | 2.16E+07 ± 4.85E+06 | 0.0581 |
| L-Serine               | HMDB0000187 | 5951     | C00065 | 2.31E+08 ± 7.04E+07 | 3.10E+08 ± 2.50E+06 | 0.0613 |
| Benzoic Acid           | HMDB0001870 | 243      | C00539 | 1.49E+06 ± 6.13E+05 | 2.14E+06 ± 2.81E+05 | 0.0636 |
| Pentanedioic acid      | HMDB0000661 | 743      | C00489 | 4.63E+06 ± 2.81E+06 | 1.77E+07 ± 1.38E+07 | 0.0726 |
| Uridine                | HMDB0000296 | 6029     | C00299 | 3.45E+07 ± 6.50E+06 | 4.13E+07 ± 3.58E+06 | 0.0738 |
| L-Leucine              | HMDB0000687 | 6106     | C00123 | 3.99E+07 ± 1.03E+07 | 5.09E+07 ± 6.53E+06 | 0.0776 |
| 2-Amino adipic acid    | HMDB0000510 | 469      | C00956 | 2.67E+06 ± 1.29E+06 | 4.22E+06 ± 1.01E+06 | 0.0821 |
| Oxalic acid            | HMDB0002329 | 971      | C00209 | 1.77E+07 ± 4.18E+06 | 2.58E+07 ± 8.30E+06 | 0.0869 |
| Pipecolic acid         | HMDB0000070 | 849      | C00408 | 1.62E+08 ± 6.48E+07 | 8.02E+07 ± 3.47E+07 | 0.0954 |
| Glycine                | HMDB0000123 | 750      | C00037 | 1.32E+07 ± 6.59E+06 | 2.04E+07 ± 4.82E+06 | 0.1200 |
| Phosphorylethanolamine | HMDB0000224 | 1015     | C00346 | 1.52E+08 ± 8.75E+07 | 2.16E+08 ± 2.74E+07 | 0.1595 |
| Niacinamide            | HMDB0001406 | 936      | C00153 | 2.49E+07 ± 9.59E+06 | 3.55E+07 ± 7.83E+06 | 0.1785 |
| Adenine                | HMDB0000034 | 190      | C00147 | 9.52E+06 ± 9.15E+06 | 1.56E+07 ± 1.88E+06 | 0.1844 |
| Phosphoric acid        | HMDB0002142 | 57424078 | C00009 | 4.09E+07 ± 1.59E+07 | 5.15E+07 ± 4.61E+06 | 0.1902 |
| 2-Pyrrolidinone        | HMDB0002039 | 12025    | C11118 | 3.97E+07 ± 1.70E+06 | 4.31E+07 ± 3.74E+06 | 0.1964 |
| L-Aspartic acid        | HMDB0000191 | 5960     | C00049 | 1.18E+08 ± 6.15E+07 | 6.78E+07 ± 4.95E+07 | 0.2144 |
| 4'-Hydroxyacetophenone | METPA0982   | –        | C10700 | 3.55E+06 ± 3.01E+06 | 1.80E+06 ± 1.52E+05 | 0.2178 |
| Ribonic acid           | HMDB0000867 | 5460677  | C01685 | 6.09E+07 ± 2.30E+07 | 3.17E+07 ± 4.46E+07 | 0.2294 |
| 1-Monopalmitin         | HMDB0011564 | 3084463  | –      | 2.03E+06 ± 8.51E+05 | 2.82E+06 ± 9.47E+05 | 0.2333 |
| 2-Aminomalonic acid    | HMDB0001147 | 100714   | C00872 | 3.75E+07 ± 1.58E+07 | 4.78E+07 ± 8.56E+06 | 0.2382 |
| Glycerol-3-phosphate   | HMDB0000126 | 439162   | C00093 | 6.70E+07 ± 8.85E+07 | 1.44E+07 ± 2.84E+07 | 0.2414 |

|                             |             |         |        |                     |                     |        |
|-----------------------------|-------------|---------|--------|---------------------|---------------------|--------|
| Pyroglutamic acid           | HMDB0000267 | 7405    | C01879 | 1.84E+08 ± 1.20E+08 | 4.02E+08 ± 2.63E+08 | 0.2465 |
| D-Fructose 1,6-bisphosphate | HMDB0001058 | 445557  | C05378 | 3.09E+06 ± 1.49E+06 | 9.99E+06 ± 1.10E+07 | 0.2594 |
| 2-Propenoic acid            | HMDB0031647 | 6581    | C19501 | 4.59E+06 ± 2.50E+06 | 1.06E+07 ± 1.05E+07 | 0.3056 |
| 3-Phosphoglyceric acid      | HMDB0000807 | 724     | C00597 | 4.49E+07 ± 4.08E+07 | 7.24E+07 ± 7.07E+06 | 0.3134 |
| L-Phenylalanine             | HMDB0000159 | 6140    | C00079 | 3.18E+07 ± 2.64E+07 | 5.06E+07 ± 3.07E+07 | 0.3292 |
| Malic acid                  | HMDB0000744 | 525     | C03668 | 1.27E+08 ± 3.43E+07 | 1.56E+08 ± 5.27E+07 | 0.3433 |
| Uracil                      | HMDB0000300 | 1174    | C00106 | 1.38E+07 ± 1.75E+06 | 1.47E+07 ± 1.07E+06 | 0.3561 |
| L-Alanine                   | HMDB0000161 | 5950    | C00041 | 5.03E+07 ± 2.37E+07 | 6.11E+07 ± 8.27E+06 | 0.3652 |
| Beta-D-Glucose 6-phosphate  | HMDB0003498 | 439427  | C01172 | 1.51E+07 ± 4.51E+06 | 1.23E+07 ± 4.70E+06 | 0.3674 |
| Pyruvic acid                | HMDB0000243 | 1060    | C00022 | 2.69E+06 ± 1.16E+06 | 2.12E+06 ± 6.98E+05 | 0.3748 |
| Propanoic acid              | HMDB0000237 | 1032    | C00163 | 6.12E+08 ± 8.33E+07 | 4.61E+08 ± 2.99E+08 | 0.4404 |
| Homoserine                  | HMDB0000719 | 12647   | C00263 | 2.65E+07 ± 4.73E+07 | 4.21E+06 ± 7.02E+05 | 0.4596 |
| Tromethamine                | HMDB0240288 | 6503    | C07182 | 5.00E+06 ± 3.56E+06 | 6.75E+06 ± 3.26E+06 | 0.4737 |
| Erythronic acid             | HMDB0000613 | 2781043 | –      | 1.01E+08 ± 1.63E+07 | 9.46E+07 ± 1.65E+07 | 0.5694 |
| Glycolic acid               | HMDB0000115 | 757     | C03547 | 1.69E+07 ± 1.53E+07 | 1.22E+07 ± 1.01E+07 | 0.5823 |
| Malonic acid                | HMDB0000691 | 867     | C04025 | 9.07E+05 ± 5.97E+05 | 1.07E+06 ± 2.95E+05 | 0.6407 |
| Tyrosine                    | HMDB0000158 | 6057    | C00082 | 2.91E+07 ± 3.44E+07 | 2.21E+07 ± 2.85E+06 | 0.6618 |
| L-Valine                    | HMDB0000883 | 6287    | C00183 | 5.53E+07 ± 1.96E+07 | 5.95E+07 ± 1.07E+07 | 0.6885 |
| Hexanoic acid               | HMDB0000535 | 8892    | C01585 | 1.79E+07 ± 2.11E+07 | 1.31E+07 ± 1.42E+07 | 0.6886 |
| Succinic acid               | HMDB0000254 | 1110    | C00042 | 2.27E+08 ± 2.07E+07 | 2.38E+08 ± 5.67E+07 | 0.6960 |
| Pantothenic acid            | HMDB0000210 | 6613    | C00864 | 2.10E+07 ± 9.97E+06 | 2.25E+07 ± 2.00E+06 | 0.7580 |
| Pyrazine                    | HMDB0034176 | 9261    | C02018 | 6.58E+07 ± 3.92E+07 | 7.15E+07 ± 2.58E+07 | 0.7919 |

|                                |             |          |        |                     |                     |        |
|--------------------------------|-------------|----------|--------|---------------------|---------------------|--------|
| D-Mannitol                     | HMDB0000765 | 6251     | C00392 | 5.39E+07 ± 3.92E+07 | 6.02E+07 ± 3.39E+07 | 0.7937 |
| Beta-Alanine                   | HMDB0000056 | 239      | C00099 | 6.53E+07 ± 2.78E+07 | 6.07E+07 ± 3.51E+07 | 0.8259 |
| D-Gluconic acid                | HMDB0000625 | 10690    | C00257 | 1.72E+06 ± 1.37E+06 | 1.83E+06 ± 8.46E+05 | 0.8875 |
| 4-Hydroxybutanoic acid         | HMDB0000549 | 7302     | C01770 | 4.33E+06 ± 2.92E+06 | 4.58E+06 ± 2.71E+06 | 0.8954 |
| Uridine-5'-monophosphate       | HMDB0000288 | 6030     | C00105 | 1.80E+06 ± 4.32E+05 | 1.84E+06 ± 4.14E+05 | 0.9017 |
| Homovanillic Acid              | HMDB0000118 | 1738     | C05582 | 1.14E+06 ± 7.52E+05 | 1.18E+06 ± 1.13E+05 | 0.9047 |
| L-Isoleucine                   | HMDB0000172 | 6306     | C00407 | 2.18E+07 ± 5.48E+06 | 2.22E+07 ± 4.58E+06 | 0.9073 |
| 2-keto-D-gluconic acid         | METPA0825   | –        | C06473 | 1.17E+07 ± 6.30E+06 | 1.20E+07 ± 5.15E+06 | 0.9214 |
| 3-Hydroxyisovaleric acid       | HMDB0000754 | 69362    | C20827 | 2.71E+06 ± 1.91E+06 | 2.84E+06 ± 1.59E+06 | 0.9297 |
| Tacrine                        | HMDB0014526 | 1935     | C01453 | 7.77E+06 ± 6.41E+06 | 7.45E+06 ± 7.62E+05 | 0.9372 |
| D-(-)-Fructose                 | HMDB0000660 | 439709   | C02336 | 1.03E+07 ± 4.72E+06 | 1.05E+07 ± 2.87E+06 | 0.9469 |
| 2-Hydroxy-3-methylbutyric acid | HMDB0000407 | 99823    | –      | 9.18E+06 ± 2.03E+06 | 9.12E+06 ± 2.08E+06 | 0.9648 |
| Phenylalanine                  | HMDB0000159 | 6140     | C00079 | 2.01E+07 ± 8.06E+06 | 1.99E+07 ± 5.43E+06 | 0.9679 |
| 3-Hydroxybutyric acid          | HMDB0000357 | 441      | C01089 | 3.04E+07 ± 1.76E+07 | 3.03E+07 ± 3.65E+06 | 0.9866 |
| D-Fructose                     | HMDB0000660 | 439709   | C02336 | 2.32E+07 ± 2.48E+07 | 2.31E+07 ± 1.92E+07 | 0.9923 |
| Ascorbic acid                  | HMDB0000044 | 54670067 | C01041 | 4.83E+07 ± 5.81E+07 | 4.83E+07 ± 3.90E+07 | 0.9997 |

**Table S10** Results from Quantitative Enrichment analysis.

| <b>Pathway name</b>                         | <b>Raw p</b> | <b>Holm p</b> | <b>FDR</b> |
|---------------------------------------------|--------------|---------------|------------|
| Alanine, aspartate and glutamate metabolism | 0.00008      | 0.0012        | 0.0005     |
| Citrate cycle (TCA cycle)                   | 0.00008      | 0.0012        | 0.0005     |
| Glyoxylate and dicarboxylate metabolism     | 0.00009      | 0.0013        | 0.0005     |
| Lipoic acid metabolism                      | 0.0003       | 0.0039        | 0.0012     |
| Amino sugar and nucleotide sugar metabolism | 0.0010       | 0.0118        | 0.0031     |
| Glycolysis / Gluconeogenesis                | 0.0021       | 0.0232        | 0.0042     |
| Fructose and mannose metabolism             | 0.0021       | 0.0232        | 0.0042     |
| Galactose metabolism                        | 0.0021       | 0.0232        | 0.0042     |
| Butanoate metabolism                        | 0.0132       | 0.1060        | 0.0235     |
| Glycine, serine and threonine metabolism    | 0.0263       | 0.1840        | 0.0421     |
| Valine, leucine and isoleucine biosynthesis | 0.0299       | 0.1840        | 0.0435     |
| Arginine biosynthesis                       | 0.0485       | 0.2420        | 0.0492     |
| Tyrosine metabolism                         | 0.0485       | 0.2420        | 0.0492     |
| Pyruvate metabolism                         | 0.0485       | 0.2420        | 0.0492     |
| Pentose phosphate pathway                   | 0.0492       | 0.2420        | 0.0492     |
| Glycerolipid metabolism                     | 0.0492       | 0.2420        | 0.0492     |

**Table S11** Effect of roxadustat on the level of energy-carrier molecules in neurons and astrocytes.

Neurons and astrocytes were treated with 20  $\mu$ M roxadustat for 24 h. DMSO treated cells were used as control. The concentration of energy-carrier molecules was quantified by using LC-MS/MS technique ( $n = 4-7$  per group; unpaired two-tailed Student's  $t$  test).

| compound name | Neurons                            |                      |            | Astrocytes                         |                      |            |
|---------------|------------------------------------|----------------------|------------|------------------------------------|----------------------|------------|
|               | mean $\pm$ SD (pmol/ $10^6$ cells) |                      | $p$ -value | mean $\pm$ SD (pmol/ $10^6$ cells) |                      | $p$ -value |
|               | control                            | Roxadustat           |            | control                            | Roxadustat           |            |
| Adenosine     | 2.40 $\pm$ 1.00                    | 2.45 $\pm$ 0.37      | 0.9243     | 1.20 $\pm$ 0.82                    | 1.09 $\pm$ 0.79      | 0.8300     |
| ADP           | 723.45 $\pm$ 144.52                | 954.41 $\pm$ 98.36   | 0.0384     | 521.55 $\pm$ 31.39                 | 519.87 $\pm$ 26.01   | 0.9243     |
| ADPR          | 2.37 $\pm$ 0.48                    | 4.18 $\pm$ 1.18      | 0.0292     | 6.70 $\pm$ 4.57                    | 4.52 $\pm$ 2.61      | 0.3617     |
| AMP           | 91.87 $\pm$ 24.34                  | 118.35 $\pm$ 16.85   | 0.1239     | 66.80 $\pm$ 27.84                  | 61.44 $\pm$ 31.53    | 0.7617     |
| ATP           | 1655.37 $\pm$ 302.51               | 2293.91 $\pm$ 362.50 | 0.0353     | 2229.86 $\pm$ 500.37               | 2222.99 $\pm$ 202.91 | 0.9776     |
| Cytidine      | 6.19 $\pm$ 0.44                    | 7.28 $\pm$ 0.30      | 0.0065     | 5.25 $\pm$ 0.75                    | 5.05 $\pm$ 0.98      | 0.7044     |
| Cytosine      | n.d.                               | n.d.                 | /          | n.d.                               | n.d.                 | /          |
| FAD           | 7.01 $\pm$ 1.13                    | 8.39 $\pm$ 0.96      | 0.1128     | 8.05 $\pm$ 2.90                    | 8.21 $\pm$ 2.87      | 0.9283     |
| GDP           | 1553.32 $\pm$ 390.15               | 2074.46 $\pm$ 409.27 | 0.1148     | 680.37 $\pm$ 92.30                 | 704.38 $\pm$ 81.65   | 0.6519     |
| GDP-Mannose   | 88.28 $\pm$ 3.61                   | 109.61 $\pm$ 18.07   | 0.0599     | 63.72 $\pm$ 7.45                   | 60.73 $\pm$ 6.92     | 0.4970     |
| GMP           | 40.77 $\pm$ 11.46                  | 49.12 $\pm$ 5.83     | 0.2418     | n.d.                               | n.d.                 | /          |
| GTP           | 571.79 $\pm$ 62.73                 | 797.12 $\pm$ 54.12   | 0.0016     | 539.99 $\pm$ 60.73                 | 559.69 $\pm$ 26.56   | 0.5160     |
| Guanosine     | 10.56 $\pm$ 1.04                   | 11.95 $\pm$ 0.40     | 0.0469     | 1.66 $\pm$ 0.16                    | 1.92 $\pm$ 0.20      | 0.1479     |
| Hypoxanthine  | 14.88 $\pm$ 2.54                   | 16.93 $\pm$ 2.26     | 0.2737     | 9.98 $\pm$ 3.13                    | 8.98 $\pm$ 3.11      | 0.5944     |
| Inosine       | 65.05 $\pm$ 18.91                  | 70.20 $\pm$ 9.25     | 0.6422     | 10.58 $\pm$ 5.70                   | 8.01 $\pm$ 4.77      | 0.4321     |

|                       |                  |                  |        |                  |                  |        |
|-----------------------|------------------|------------------|--------|------------------|------------------|--------|
| NAAD                  | 118.51 ± 18.12   | 138.93 ± 7.08    | 0.0804 | 77.17 ± 15.01    | 70.37 ± 10.28    | 0.4034 |
| NAD                   | 308.44 ± 55.65   | 379.93 ± 38.80   | 0.0796 | 204.93 ± 45.91   | 185.84 ± 42.30   | 0.4806 |
| NADH                  | 1016.52 ± 205.59 | 1409.11 ± 356.88 | 0.1052 | 1862.79 ± 401.14 | 2361.30 ± 220.72 | 0.0315 |
| NADP                  | 16.76 ± 2.60     | 34.68 ± 8.72     | 0.0077 | 19.67 ± 6.62     | 18.38 ± 1.98     | 0.6869 |
| NADPH                 | 1284.44 ± 191.85 | 1377.43 ± 209.14 | 0.5366 | 1441.64 ± 225.12 | 1249.98 ± 253.28 | 0.1969 |
| NAMN                  | 59.78 ± 1.01     | 69.56 ± 5.46     | 0.0124 | 55.48 ± 0.37     | 55.52 ± 0.29     | 0.8534 |
| NAM                   | 21.25 ± 1.34     | 30.82 ± 5.64     | 0.0164 | 59.32 ± 28.13    | 57.55 ± 24.87    | 0.9127 |
| NMN                   | 19.88 ± 2.85     | 30.49 ± 5.08     | 0.0108 | 4.94 ± 0.60      | 5.06 ± 0.36      | 0.6998 |
| NR                    | n.d.             | n.d.             | /      | n.d.             | n.d.             | /      |
| SAH                   | 2.09 ± 0.32      | 2.31 ± 0.15      | 0.2518 | n.d.             | n.d.             | /      |
| SAM                   | 37.47 ± 6.09     | 44.23 ± 4.25     | 0.1182 | 64.01 ± 7.22     | 66.98 ± 3.72     | 0.4227 |
| UDP-GlcNAc            | 777.43 ± 154.04  | 795.49 ± 112.73  | 0.8562 | 2509.38 ± 365.00 | 2430.62 ± 331.48 | 0.7103 |
| UDP-Glucose-Galactose | 184.57 ± 11.24   | 212.88 ± 34.61   | 0.1707 | 1645.44 ± 366.59 | 1558.76 ± 154.41 | 0.6327 |
| Uridine               | 5.55 ± 0.40      | 6.57 ± 0.39      | 0.0105 | 4.78 ± 0.96      | 4.61 ± 1.14      | 0.7792 |

ADP: Adenosine di-phosphate; ADPR: Adenine diphosphate ribose; AMP: Adenosine mono-phosphate; ATP: Adenosine tri-phosphate; FAD: Flavin adenine dinucleotide; GDP: Guanosine di-phosphate; GMP: Guanosine mono-phosphate; GTP: Guanosine tri-phosphate; NAAD: Nicotinic acid adenine dinucleotide; NAD: Nicotinamide adenine dinucleotide; NADP: Nicotinamide adenine dinucleotide phosphate; NAM: Nicotinamide; NAMN: Nicotinic acid mononucleotide; n.d.: not detectable; NMN: Nicotinamide mononucleotide; NR: NAM riboside; SAH: S-Adenosylhomocystein; SAM: S-Adenosylmethionin; UDP-GlcNAc: Uridine diphosphate-N-acetylglucosamine

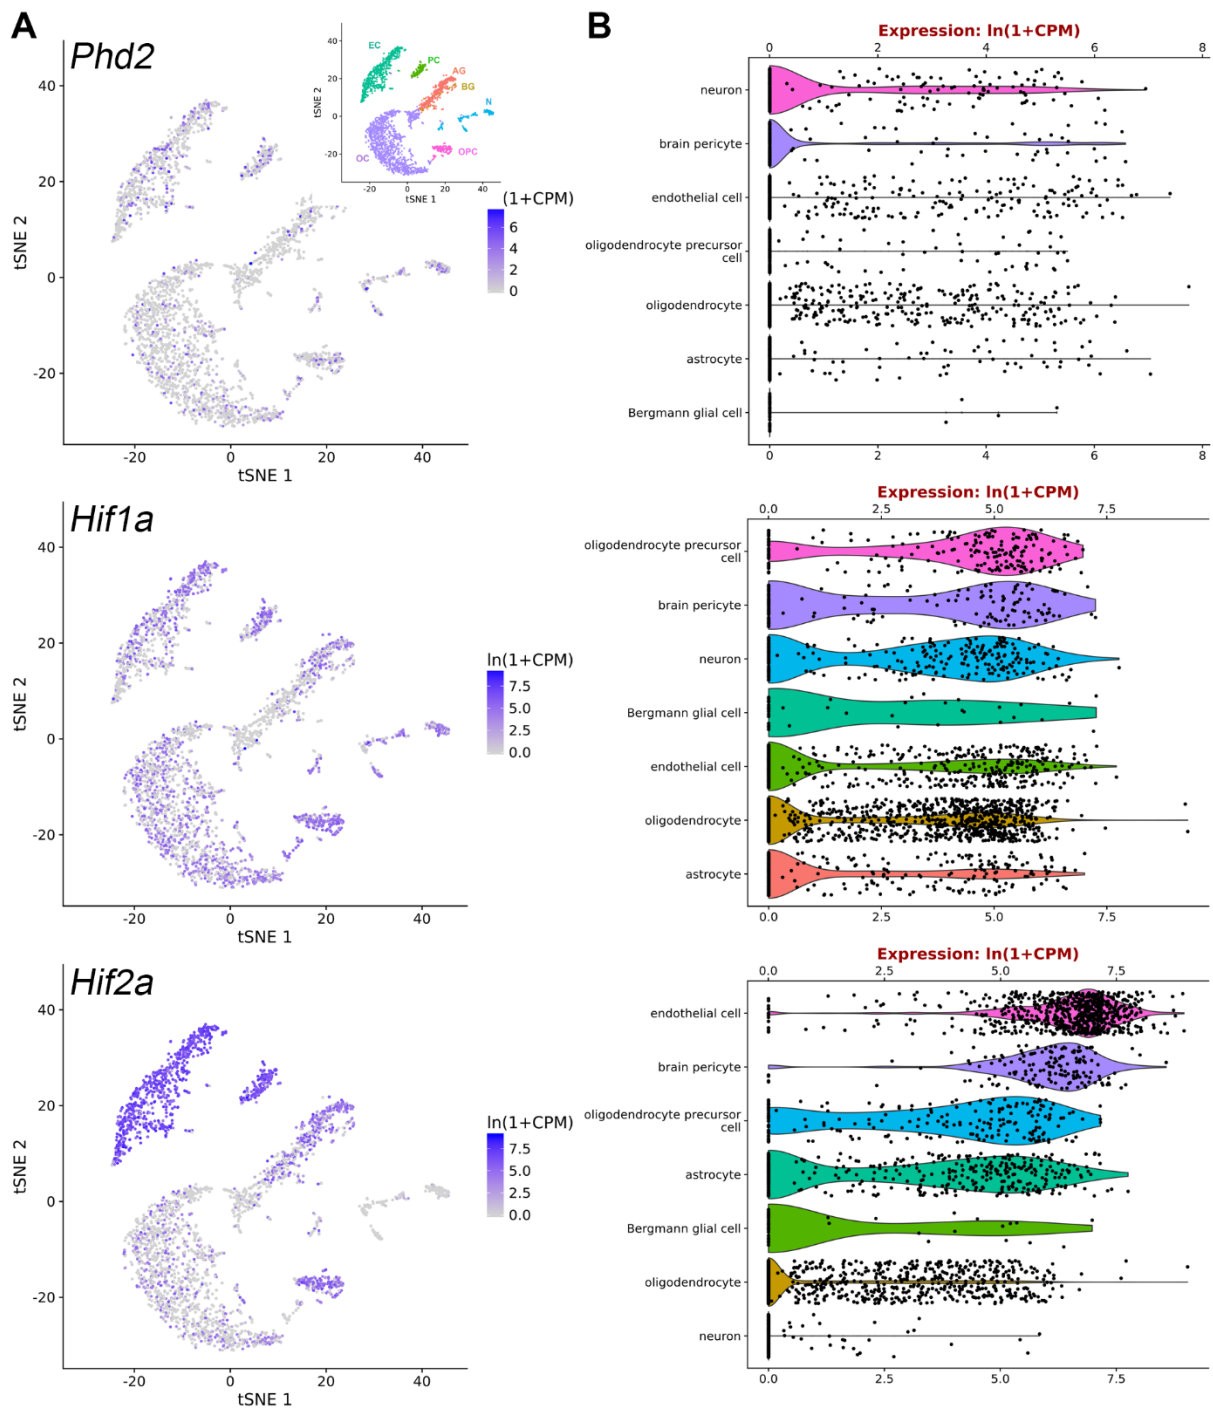

**Figure S1** Expression of *Phd2*, *Hif1a* and *Hif2a* in brain-resident cells. **(A)** *t*-SNE plots showing scRNA-seq analysis of *Phd2*, *Hif1a* and *Hif2a* expression in non-myeloid cells of the murine brain ( $n = 7$ ). Data from the Tabula Muris Consortium <sup>1</sup>. **(B)** Violin plots of log-normalized *Phd2*, *Hif1a* and *Hif2a* counts per million reads (CPM) in non-myeloid brain cells ( $n = 7$ ). Data from the Tabula Muris Consortium. AG, astroglia; BG, Bergmann glia; EC, endothelial cell; N, neuron; OPC, oligodendrocyte precursor cell; OC, oligodendrocyte; PC, pericyte.

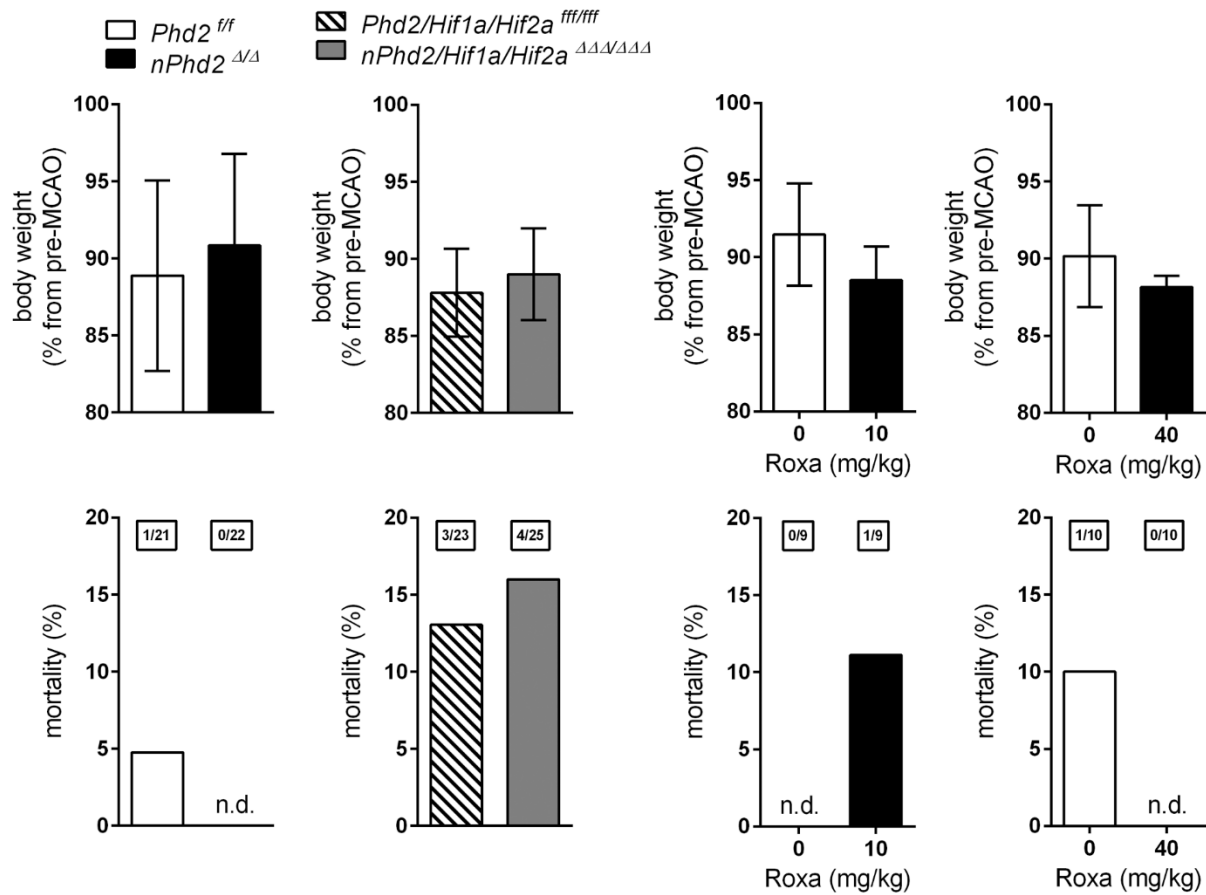

**Figure S2** Body weight and mortality after acute ischemic stroke. Mice were subjected to 60 min of MCAO followed by 24 h reperfusion. The body weight was measured before and after ischemia/reperfusion injury, and is shown as relative weight 24 h post-MCAO as compared to values prior to MCAO (mean  $\pm$  SD; unpaired two-tailed Student's *t* test). The mortality of mice was monitored within 24 h upon onset of reperfusion (mean; Fisher's exact test).



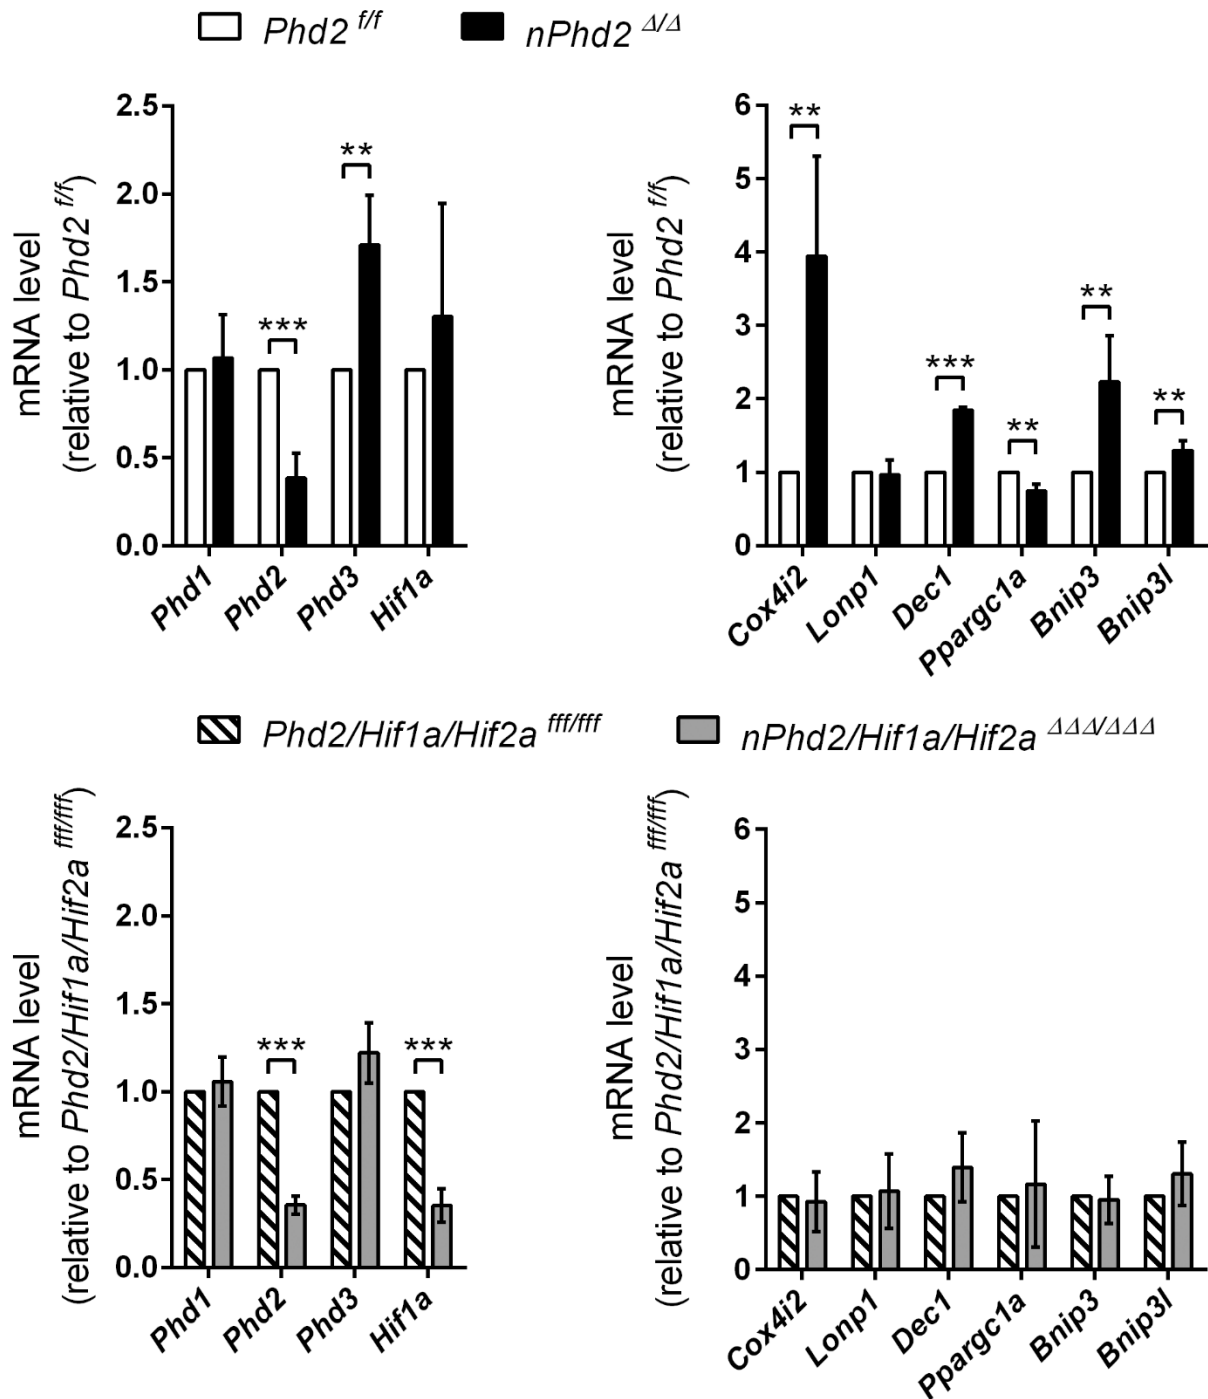

**Figure S3** HIF-dependent transcriptional response in cortical neurons derived from transgenic mice lacking members of the neuronal oxygen sensing pathway in neurons. Real-time RT-PCR was used to determine transcript levels of *Phd1-3*, *Hif1a*, and HIF-target genes in primary neurons isolated from brains of neonatal *Phd2*<sup>f/f</sup>, *nPhd2*<sup>Δ/Δ</sup>, *Phd2/Hif1a/Hif2a*<sup>fff/fff</sup> and *nPhd2/Hif1a/Hif2a*<sup>ΔΔΔ/ΔΔΔ</sup> mice. Values are normalized to *Rps12* and expressed as fold change to *Phd2*<sup>f/f</sup> or *Phd2/Hif1a/Hif2a*<sup>fff/fff</sup>, respectively (mean ± SD; n = 4-5 per group; unpaired two-tailed Student's *t* test; \*\* *p* < 0.01, \*\*\* *p* < 0.001).

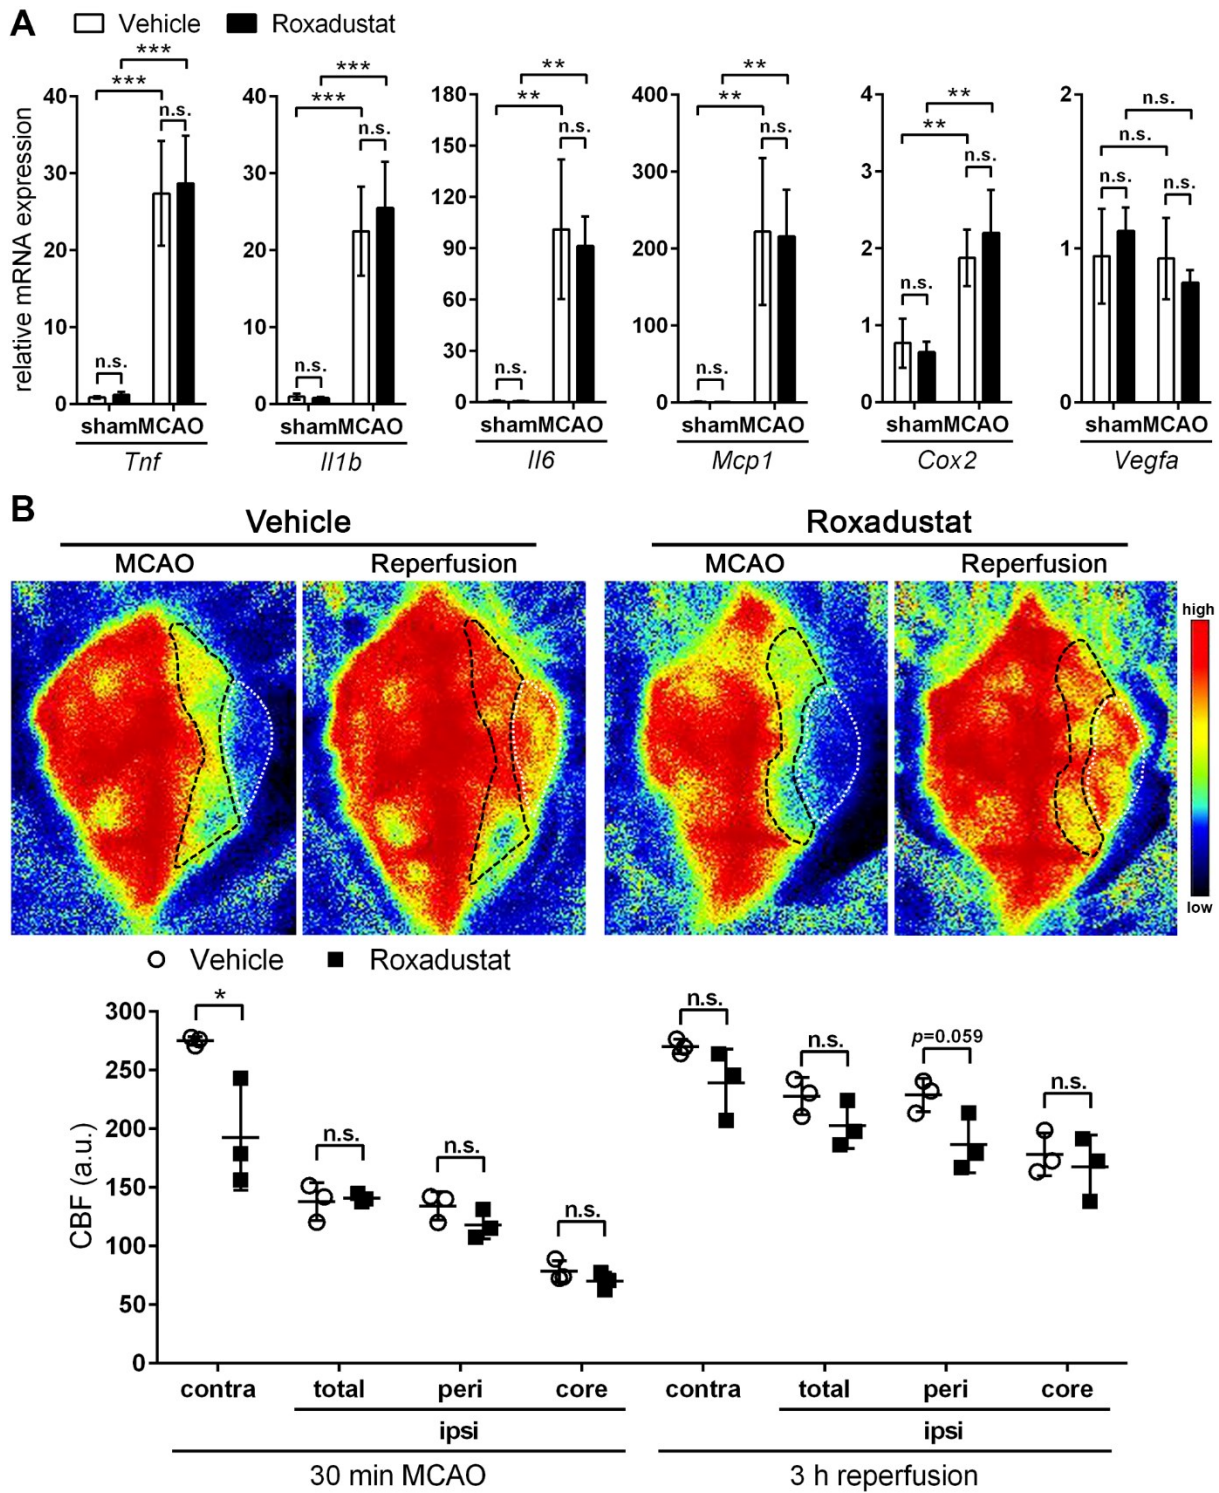

**Figure S4** Impact of roxadustat on pro-inflammatory cytokine expression and blood flow reperfusion upon transient cerebral ischemia. Roxadustat was applied intraperitoneally to C57BL/6 mice at a dosage of 40 mg/kg body weight twice daily with 12 h between doses for 4 days. Control mice received equal volumes of vehicle solution. **(A)** Mice were subjected to 60 min of MCAO followed by 24 h reperfusion. Sham-operated mice served as control. Real-time RT-PCR was used to determine transcript levels of pro-inflammatory cytokines. Values are normalized to *Rps12* and expressed as fold change to vehicle treated and sham-operated mice

( $n = 3$  per group; Two-way ANOVA with Holm-Sidak's multiple comparisons test; \*\*  $p < 0.01$ , \*\*\*  $p < 0.001$ ). **(B)** Mice were subjected to 60 min of MCAO followed by 3 h reperfusion. Cortical blood flow (CBF) was measured on the skull of living mice during MCAO and after reperfusion using high-resolution laser speckle contrast imaging (LSCI). Representative LSCI perfusion images of the cortical surface at 30 min MCAO and 3 h upon reperfusion. Color bar code: The colors from blue to red represent the blood flow velocity from lower to higher. CBF is given in arbitrary units (a.u.). ROIs across the ipsilateral brain hemisphere were defined according the following CBF thresholds: infarct core (cortical blood flow  $< 40\%$  of mean contralateral hemisphere during MCAO), hypoperfused peri-infarct region (cortical blood flow between 40 and 70% of mean contralateral hemisphere during MCAO) ( $n = 3$  per group; unpaired two-tailed Student's  $t$  test; \*  $p < 0.05$ ).

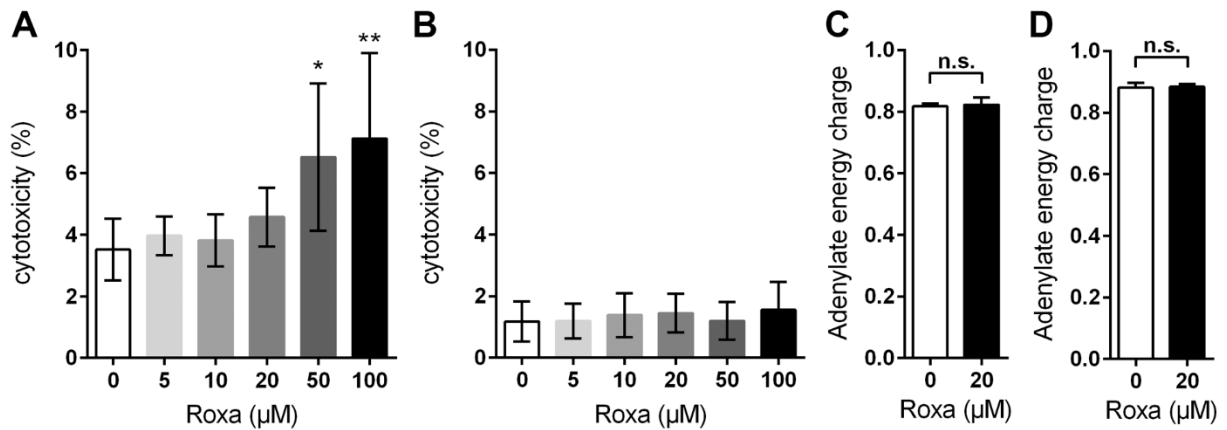

**Figure S5** Impact of roxadustat on the viability of neurons and astrocytes. **(A)** Neurons and **(B)** astrocytes were treated with roxadustat at the indicated concentrations for 24 h. DMSO treated cells were used as control. Measurement of lactate dehydrogenase (LDH) activity released from the cytosol of damaged cells into the supernatant was used to determine cytotoxicity. Values are normalized to the total LDH activity released by cell lysis ( $n = 3-6$  per group; One-way ANOVA with Holm-Sidak's multiple comparisons test; \*  $p < 0.05$ , \*\*  $p < 0.01$ ). **(C)** Neurons and **(D)** astrocytes were treated with 20 μM roxadustat for 24 h. DMSO treated cells were used as control. The intracellular concentration of adenosine phosphates was quantified by using LC-MS/MS technique. The adenylyate energy charge was calculated as follows:  $AEC = ([ATP]_i + 0.5 \times [ADP]_i) / ([ATP]_i + [ADP]_i + [AMP]_i)$  ( $n = 4-7$  per group; unpaired two-tailed Student's  $t$  test).

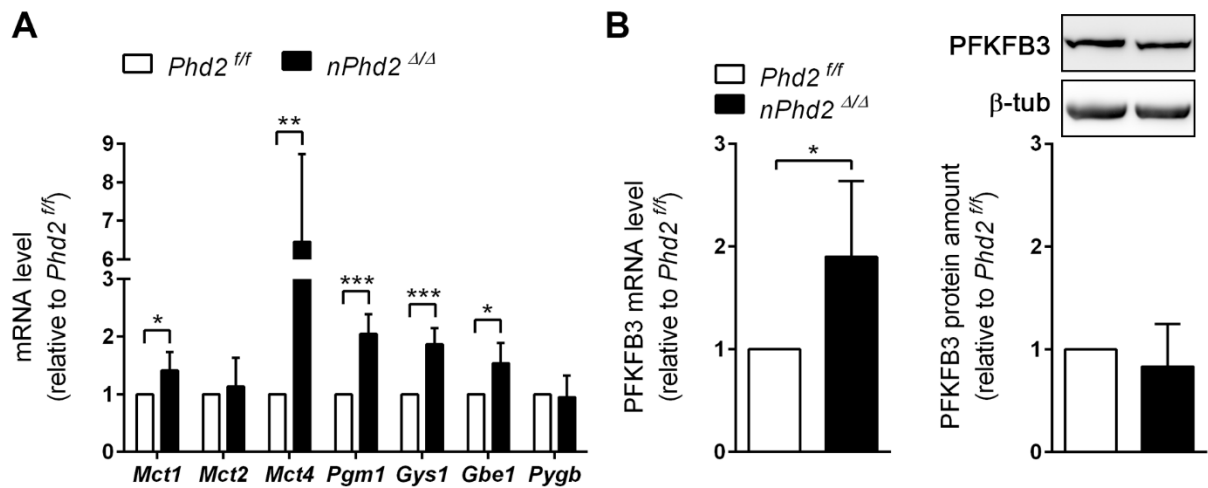

**Figure S6** Gene expression in *Phd2* deficient neurons. RNA and proteins were prepared from neurons derived from *Phd2<sup>ff</sup>* and *nPhd2<sup>Δ/Δ</sup>* mice. **(A)** Real-time RT-PCR was used to determine transcript levels of monocarboxylate transporter (MCT) isoforms and genes related to glycogen metabolism. **(B)** Real-time RT-PCR and Western blotting were applied to determine transcript and protein levels of PFKFB3. Values are normalized to *Rps12* (mRNA) or  $\beta$ -tubulin (protein) and expressed as fold change to *Phd2<sup>ff</sup>* ( $n = 3-5$  per group; unpaired two-tailed Student's *t* test; \*  $p < 0.05$ , \*\*  $p < 0.01$ , \*\*\*  $p < 0.001$ ).

## References

1. Tabula Muris C, Overall c, Logistical c, Organ c, processing, Library p *et al.* Single-cell transcriptomics of 20 mouse organs creates a Tabula Muris. *Nature* 2018; 562(7727): 367-372.
